# Supplementary material for: Study on the Atherton–Todd reaction mechanism
Source: Royal Society of Chemistry journal article supplement (doi:10.1039/c4ra10228b), 2014-01-01
Supplement: c4ra10228b1.pdf [file c4ra10228b1.pdf]

## Supplementary spectral data

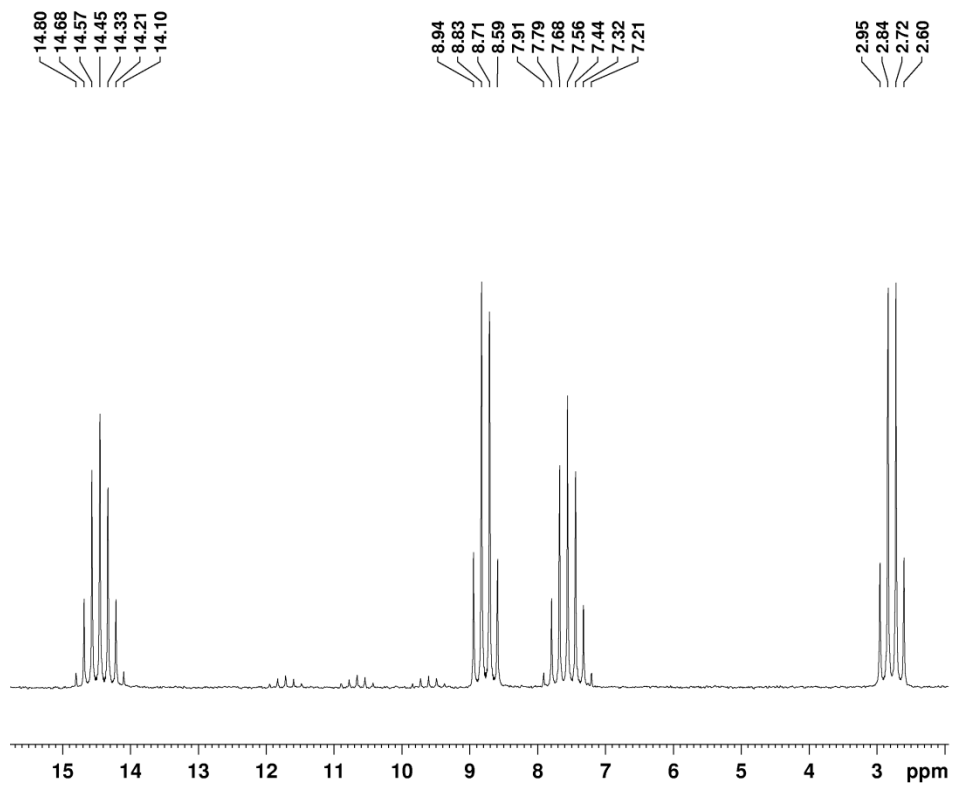

**Figure 1.**  $^{31}\text{P}$  NMR spectrum of the reaction mixture of dimethyl H-phosphonate and dibutylamine.

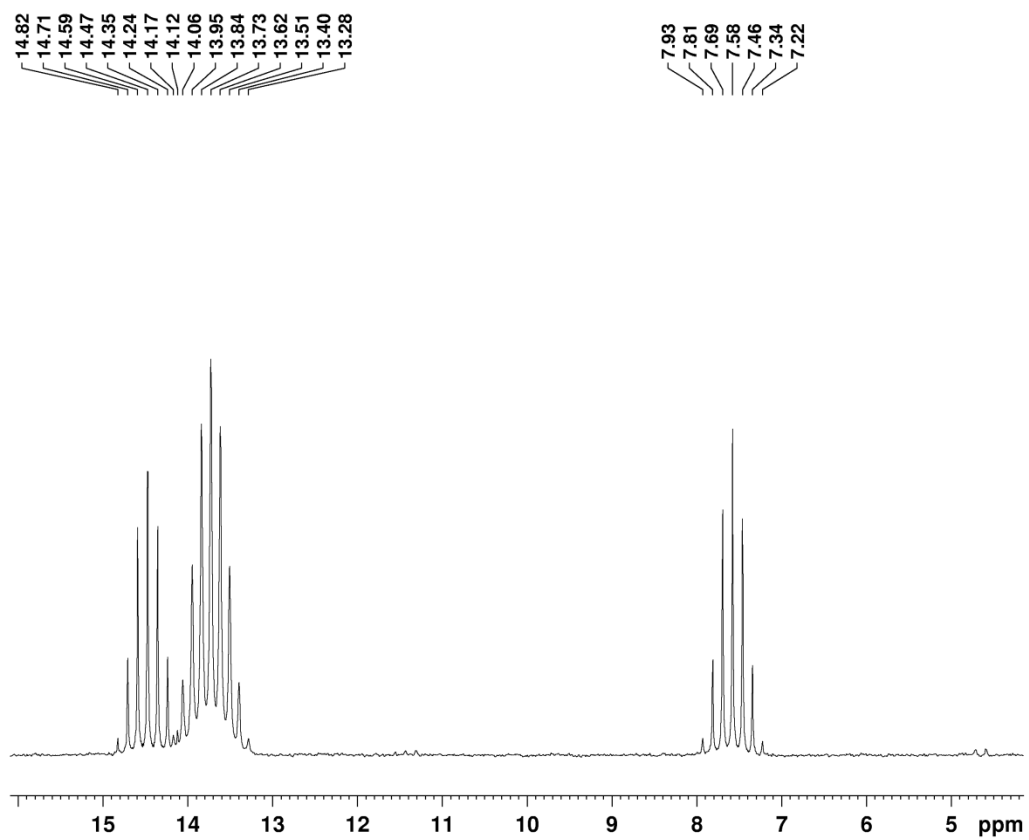

**Figure 2.**  $^{31}\text{P}$  NMR spectrum of the reaction mixture of dimethyl H-phosphonate, carbon tetrachloride and dibutylamine.

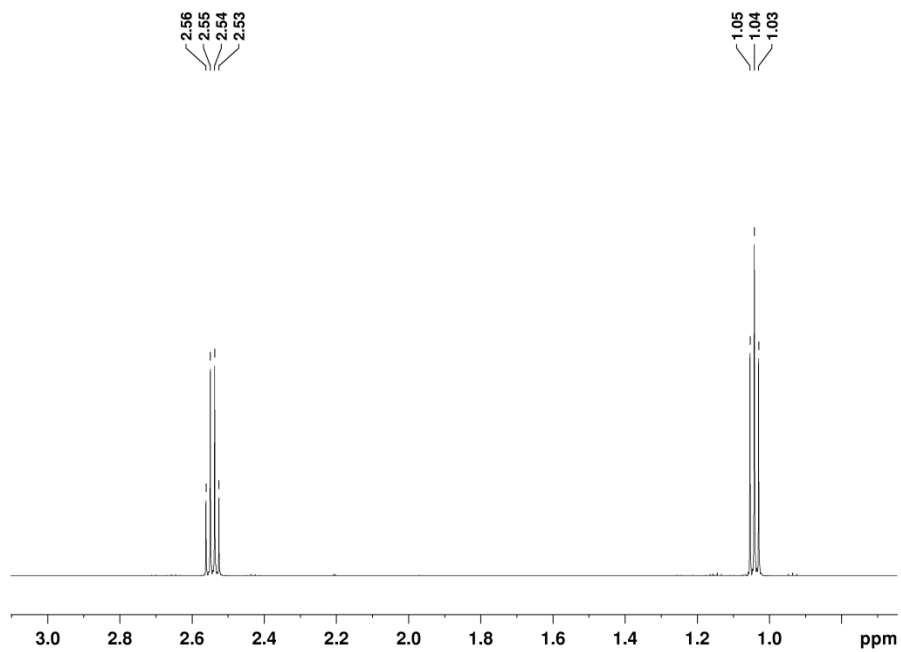

**Figure 3.**  $^1\text{H}$  NMR spectrum of the complex between carbon tetrachloride and triethylamine.

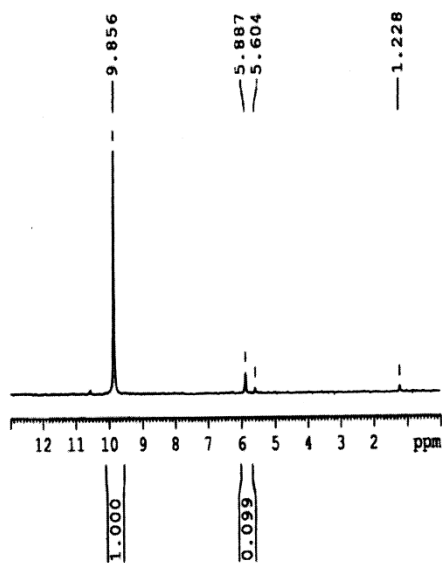

a)

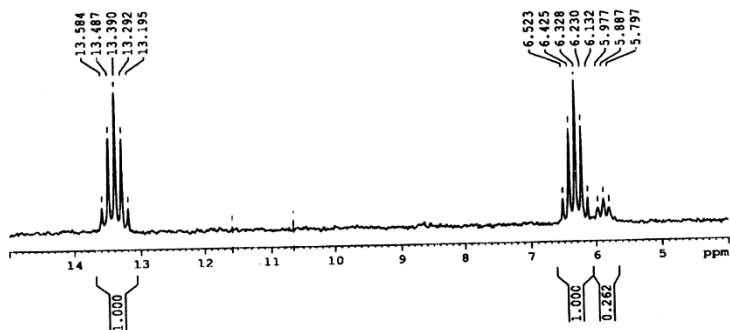

b)

**Figure 4.**  $^{31}\text{P}\{\text{H}\}$  NMR spectrum (a) and  $^{31}\text{P}$  NMR spectrum (b) of the mixture of poly(oxyethylene H-phosphonate), triethylamine and carbon tetrachloride.
